# Supplementary material for: The 2022 European Society of Cardiology Cardio-oncology Guidelines in Focus
Source: PubMed Central journal article supplement — Eur Cardiol. 2023 Apr 21;18:e16. doi: 10.15420/ecr.2022.63 (PMC10316349; doi:10.15420/ecr.2022.63), 2023-04-21
Supplement: ecr-18-e16-Supp.pdf [file ecr-18-e16-Supp.pdf]

**Supplementary Table 1: Class I recommendations for cardiovascular screening during treatment and the first 12 months after treatment with different cancer therapies**

| Cancer treatment                                                    | Recommendations during treatment and the first 12 months after treatment                                                                                                                                                                                                                                                                                                                                                                                                                                                                                                                           |
|---------------------------------------------------------------------|----------------------------------------------------------------------------------------------------------------------------------------------------------------------------------------------------------------------------------------------------------------------------------------------------------------------------------------------------------------------------------------------------------------------------------------------------------------------------------------------------------------------------------------------------------------------------------------------------|
| Anthracycline chemotherapy e.g., doxorubicin, epirubicin, idrubicin | <ul style="list-style-type: none"> <li>• Baseline TTE in all patients (IB)</li> <li>• TTE within 12 months after completing treatment (IB)</li> <li>• In high and very high-risk patients, TTE every two cycles and within 3 months of finishing treatment (IC)</li> <li>• Baseline NP and cTn in high and very high-risk patients before chemotherapy (IB)</li> <li>• In high and very high-risk patients, cTn and NP before every cycle and 3 and 12 months after treatment completion (IB)</li> </ul>                                                                                           |
| HER2-targeted therapies e.g., trastuzumab, pertuzumab, neratinib    | <ul style="list-style-type: none"> <li>• Baseline TTE in all patients (IB)</li> <li>• Where HER2-targeted treatment is used in the adjuvant and neo-adjuvant setting, TTE is recommended every 3 months during treatment and once with 12 months of completing treatment (IB)</li> <li>• With metastatic disease, TTE is recommended every 3 months in the first year and if the patient remains without CV toxicity the frequency can reduce to every 6 months (IC)</li> <li>• Pre-treatment baseline NP and cTn measurements are recommended in high and very high-risk patients (IC)</li> </ul> |
| Fluoropyrimidines e.g., 5-Fluorouracil, capecitabine                | <ul style="list-style-type: none"> <li>• A pre-treatment baseline evaluation should be conducted including BP measurement, ECG, lipids, HbA1c and SCORE2 or SCORE2-OP (IC)</li> <li>• Baseline TTE in patients with symptomatic CV disease (IC)</li> </ul>                                                                                                                                                                                                                                                                                                                                         |

|                                                                                                                                                               |                                                                                                                                                                                                                                                                                                                                                                                                                                                                                                                                                                                                             |
|---------------------------------------------------------------------------------------------------------------------------------------------------------------|-------------------------------------------------------------------------------------------------------------------------------------------------------------------------------------------------------------------------------------------------------------------------------------------------------------------------------------------------------------------------------------------------------------------------------------------------------------------------------------------------------------------------------------------------------------------------------------------------------------|
| <p>VEGFi's - intravenous MAb's e.g., bevacizumab and oral TKI's e.g., sorafenib</p>                                                                           | <ul style="list-style-type: none"> <li>• BP should be measured at every clinical visit for patients given VEGFi, bevacizumab, or ramucirumab (IC)</li> <li>• Daily home monitoring of BP during the first cycle of VEGFi or after any dose increase, and every 2-3 weeks afterwards (IC)</li> <li>• Patients with moderate to high risk of QTc prolongation treated with VEGFi should have monthly QTc monitoring for 3 months then QTc monitoring every 3-6 months (IC)</li> <li>• Baseline TTE in patients treated with VEGFi or bevacizumab at high and very high risk of cardiotoxicity (IC)</li> </ul> |
| <p>Multi-targeted kinase inhibitors targeting BCR-ABL TKI's - recommendations for 2nd generation e.g., nilotinib and 3rd generation e.g., ponatinib TKI's</p> | <ul style="list-style-type: none"> <li>• Baseline CV risk assessment (IC)</li> <li>• With nilotinib or ponatinib treatment, CV risk assessment every 3 months during first year then every 6-12 months (IC)</li> <li>• Baseline TTE in patients due to receive dasatinib (IC)</li> </ul>                                                                                                                                                                                                                                                                                                                    |
| <p>Bruton tyrosine kinase inhibitors e.g., ibrutinib</p>                                                                                                      | <ul style="list-style-type: none"> <li>• BP measurement at every clinical visit (IB)</li> <li>• Baseline TTE in high-risk patients before treatment (IC)</li> <li>• TTE in all patients who develop AF on treatment (IC)</li> <li>• Opportunistic AF screening at every clinical visit by pulse-taking or ECG rhythm strip while on treatment (IC)</li> </ul>                                                                                                                                                                                                                                               |
| <p>Multiple myeloma treatment including alkylating agents e.g., cyclophosphamide, immunomodulatory drugs e.g.,</p>                                            | <ul style="list-style-type: none"> <li>• BP measurement at every clinical visit for patients treated with PI (IC)</li> <li>• NP measurement before treatment with PI in high and very high-risk patients (IC)</li> <li>• NP and cTn measurement at baseline and every 3-6 months in patients with amyloid light chain cardiac amyloidosis (IB)</li> </ul>                                                                                                                                                                                                                                                   |

|                                                                                                                                                                                                                                                                                           |                                                                                                                                                                                                                                                                                                                                                                                                           |
|-------------------------------------------------------------------------------------------------------------------------------------------------------------------------------------------------------------------------------------------------------------------------------------------|-----------------------------------------------------------------------------------------------------------------------------------------------------------------------------------------------------------------------------------------------------------------------------------------------------------------------------------------------------------------------------------------------------------|
| <p>lenalidomide, PI's e.g., bortezomib and MAb's e.g., daratumumab</p>                                                                                                                                                                                                                    | <ul style="list-style-type: none"> <li>• Baseline TTE for multiple myeloma patients prior to PI (IC)</li> <li>• Therapeutic dose LWMH in multiple myeloma patients with prior VTE (IB)</li> <li>• Prophylactic LMWH in multiple myeloma patients with VTE risk factors for at least the first 6 months of therapy (IA)</li> </ul>                                                                         |
| <p>RAF inhibitors e.g., dabrafenib and MEK inhibitors e.g., binimetinib</p>                                                                                                                                                                                                               | <ul style="list-style-type: none"> <li>• BP monitoring each clinic visit, weekly outpatient monitoring for first 3 months and monthly thereafter (IC)</li> <li>• For cobimetinib/vemurafenib, ECG monitoring at 2 and 4 weeks after initiation and every 3 months onwards (IC)</li> <li>• Baseline TTE in high and very high-risk patients due to receive combined RAF and MEK inhibitors (IC)</li> </ul> |
| <p>Immune checkpoint inhibitors with MAb's targeting CTLA-4 e.g., ipilimumab, PD-1 e.g., nivolumab, and PD-L1 e.g., atezolizumab</p>                                                                                                                                                      | <ul style="list-style-type: none"> <li>• Baseline ECG, NP and cTn before treatment (IB)</li> <li>• Baseline TTE in high-risk patients before treatment (IB)</li> <li>• CV assessment every 6-12 months in high risk patients needing treatment &gt;12 months (IC)</li> </ul>                                                                                                                              |
| <p>Androgen deprivation therapies for prostate cancer including GnRH agonists e.g., goserelin, GnRH antagonists e.g., degarelix, 1st generation anti-androgens e.g., bicalutamide, 2nd generation anti-androgens e.g., enzalutamide, androgen metabolism inhibitors e.g., abiraterone</p> | <ul style="list-style-type: none"> <li>• In patients without pre-existing CV disease, baseline risk assessment with SCORE2 or SCORE2-OP (IB)</li> <li>• Baseline and serial ECGs in those at risk of QTc prolongation during therapy (IB)</li> <li>• Annual CV risk assessment during therapy (IB)</li> </ul>                                                                                             |

|                                                                                                                                                                                      |                                                                                                                                                                                                                                                                                                                                                                                        |
|--------------------------------------------------------------------------------------------------------------------------------------------------------------------------------------|----------------------------------------------------------------------------------------------------------------------------------------------------------------------------------------------------------------------------------------------------------------------------------------------------------------------------------------------------------------------------------------|
| <p>Endocrine therapies for breast cancer including SERM's e.g., tamoxifen and aromatase inhibitors e.g., letrozole</p>                                                               | <ul style="list-style-type: none"> <li>• In patients without pre-existing CV disease, baseline risk assessment and estimation of 10-year risk of fatal and non-fatal events with SCORE2 or SCORE2-OP (IC)</li> <li>• Annual CV risk assessment during therapy for those with a high 10-year risk of fatal and non-fatal events (according to SCORE2 or SCORE2-OP score; IC)</li> </ul> |
| <p>CDK 4/6 inhibitors e.g., palbociclib, ribociclib, abemaciclib</p>                                                                                                                 | <ul style="list-style-type: none"> <li>• For patients on ribociclib, QTc monitoring at baseline, and day 14 and 28 of treatment (IA)</li> <li>• For patients on ribociclib, QTc monitoring with any dose increase (IB)</li> </ul>                                                                                                                                                      |
| <p>ALK inhibitors e.g., crizotinib and epidermal growth factor receptor inhibitors e.g., osimertinib</p>                                                                             | <ul style="list-style-type: none"> <li>• Baseline CV risk assessment in all patients (IC)</li> <li>• Baseline TTE prior to treatment with osimertinib (IB)</li> </ul>                                                                                                                                                                                                                  |
| <p>CAR-T and TIL therapies</p>                                                                                                                                                       | <ul style="list-style-type: none"> <li>• Baseline ECG, NP, and cTn in all patients prior to treatment (IC)</li> <li>• Baseline TTE in patients with pre-existing CV disease prior to treatment (IC)</li> <li>• NP and cTn measurement alongside TTE in patients with CRS of American Society for Transplantation and Cellular Therapy grade <math>\geq 2</math> (IC)</li> </ul>        |
| <p>Radiotherapy to a volume including the heart</p>                                                                                                                                  | <ul style="list-style-type: none"> <li>• Baseline CV assessment and estimation of 10-year risk of fatal and non-fatal events with SCORE2 or SCORE2-OP (IB)</li> </ul>                                                                                                                                                                                                                  |
| <p>HSCT (this incorporates a multi-factorial treatment with conditioning, which can include radiation, chemotherapy and immunosuppression in the case of allogeneic transplants)</p> | <ul style="list-style-type: none"> <li>• Baseline and serial CV risk assessment (3 and 12 months, then every 12 months) with BP measurement, ECG, lipids and HbA1c (IC)</li> <li>• Echocardiography prior to HSCT in all patients (IC)</li> </ul>                                                                                                                                      |

The level of evidence varies: level A, data from randomised controlled trials (RCTs) or meta-analysis; level B, data from a single RCT or large non-randomised studies; level C, expert consensus, small studies, retrospective studies or registry data. Abbreviations: TTE, trans-thoracic echocardiography; NP, natriuretic peptide; cTn, cardiac troponin; HER2, human epidermal receptor 2; CV, cardiovascular; BP, blood pressure; ECG, electro-cardiogram; HbA1c, glycated haemoglobin; SCORE2, Systematic Coronary Risk Estimation 2; SCORE2-OP, Systematic Coronary Risk Estimation 2-Older Persons; VEGFi, vascular endothelial growth factor inhibitor; MAb, monoclonal antibody; TKI, tyrosine kinase inhibitor; QTc, corrected QT interval; BCR-ABL, breakpoint cluster region-Abelson oncogene locus; AF, atrial fibrillation ; PI, proteasome inhibitor; LMWH, low molecular weight heparin; VTE, venous thromboembolism; RAF, rapidly accelerated fibrosarcoma; MEK, mitogen-activated extracellular signal-regulated kinase; CTLA-4, cytotoxic T-lymphocyte associated protein 4; PD-1, programmed cell death protein-1; PD-L1, programmed cell death ligand-1; GnRH, gonadotropin-releasing hormone; SERM, selective oestrogen receptor modulator; CDK 4/6, cyclin dependent kinase 4/6; ALK, anaplastic lymphoma kinase; CAR-T, chimeric antigen receptor T-cell; TIL, tumour-infiltrating lymphocyte; CRS, cytokine release syndrome; HSCT, haematopoietic stem cell transplantation. This table was adapted from recommendation tables 7 to 22 from <sup>21</sup> with permission from Oxford University Press.
